# Supplementary material for: Ammonium Fluoride as Suitable Additive for HILIC-Based LC-HRMS Metabolomics
Source: MDPI journal article supplement (doi:10.3390/metabo9120292), 2019-11-27
Supplement: s1 [file s1]

RT: 4.69 - 8.72

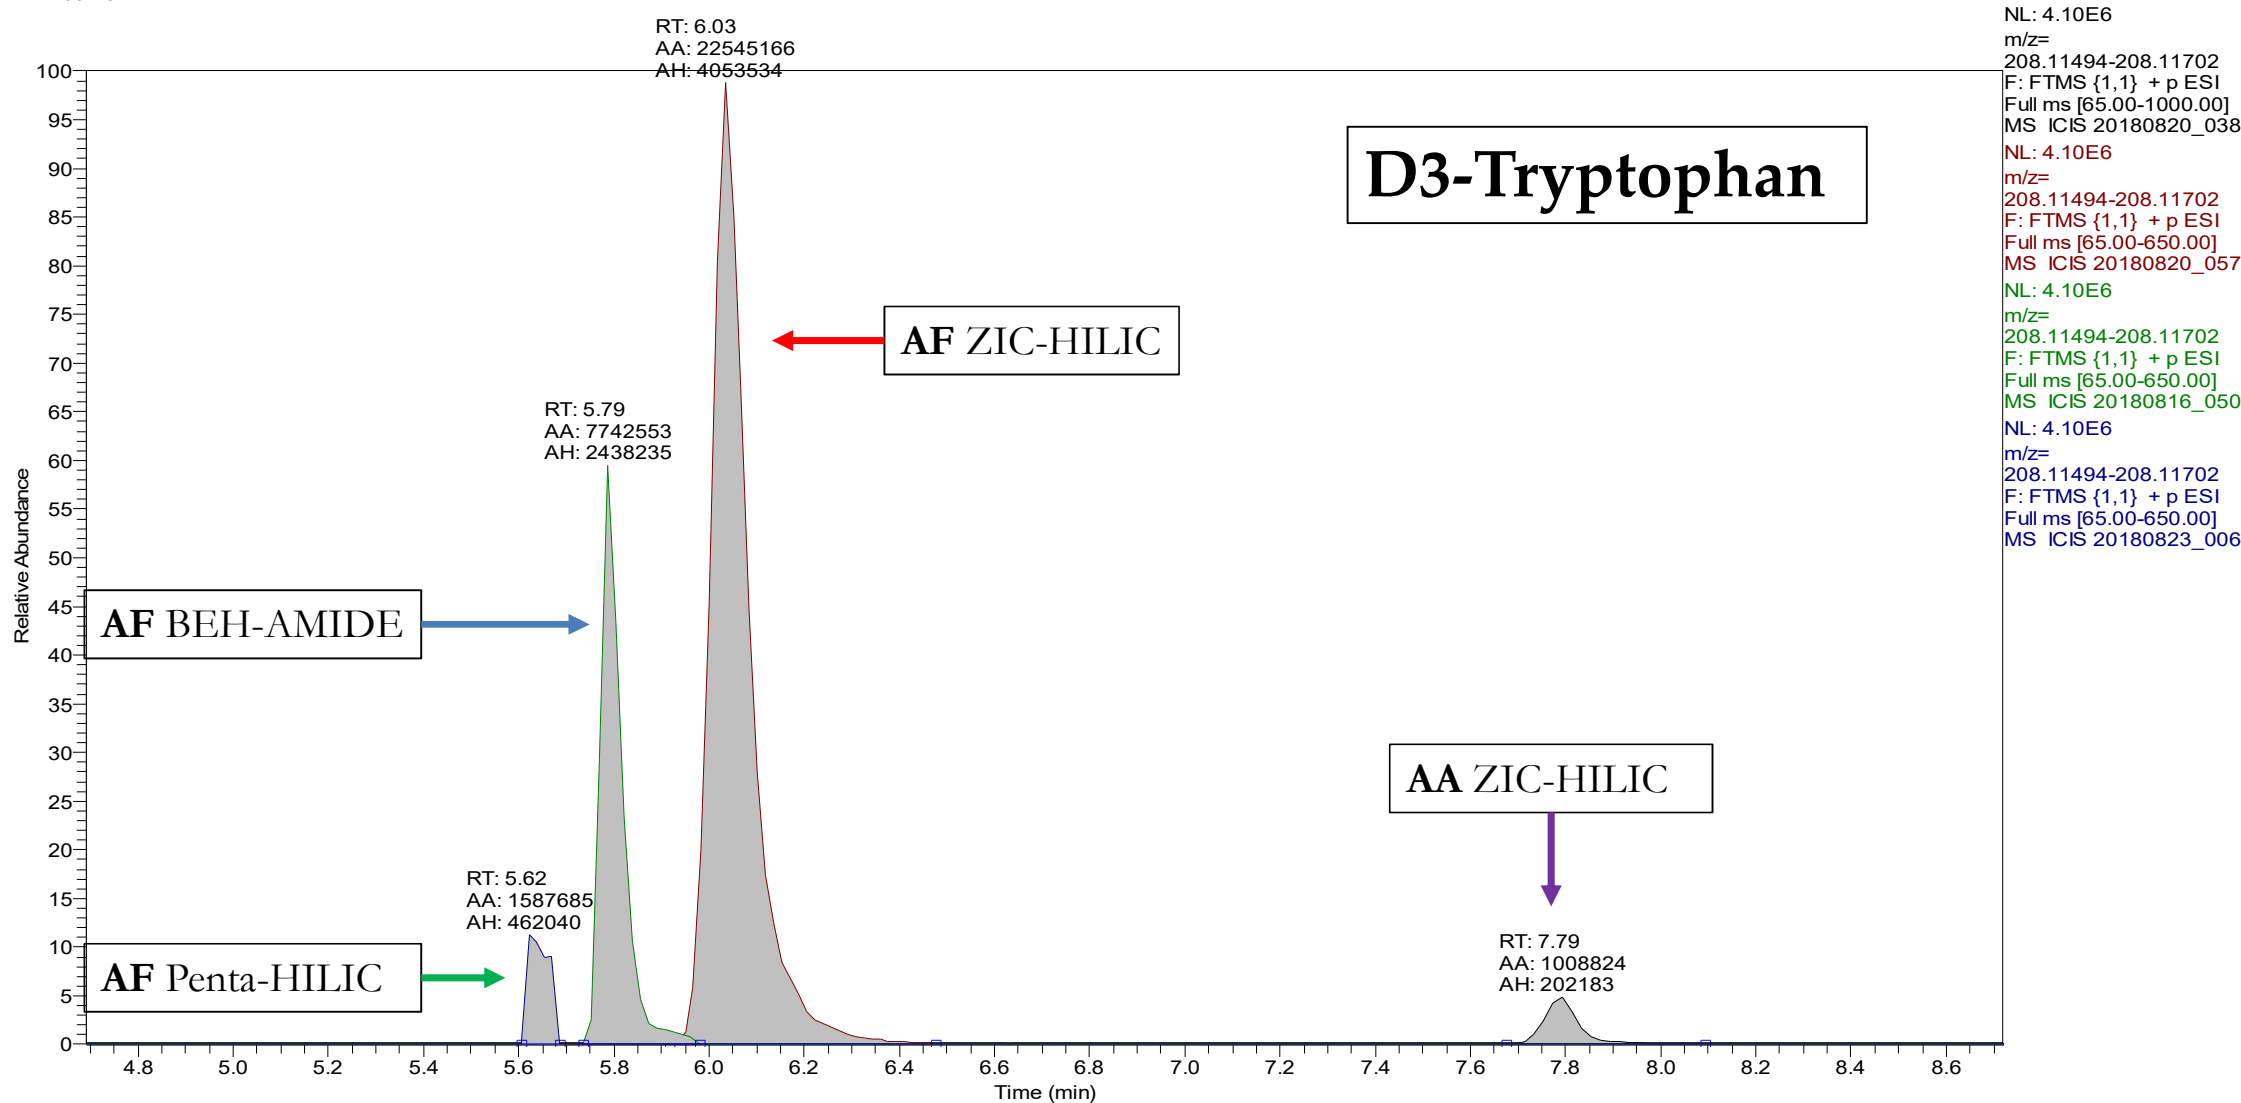

**Figure S1.** A comparison of the peaks of the deuterated tryptophan between the AA method on the Zic-Hilic column, and the AF method performed on 3 different columns: Zic-Hilic, Penta-Hilic and the BEH-Amide columns.

RT: 0.00 - 22.02

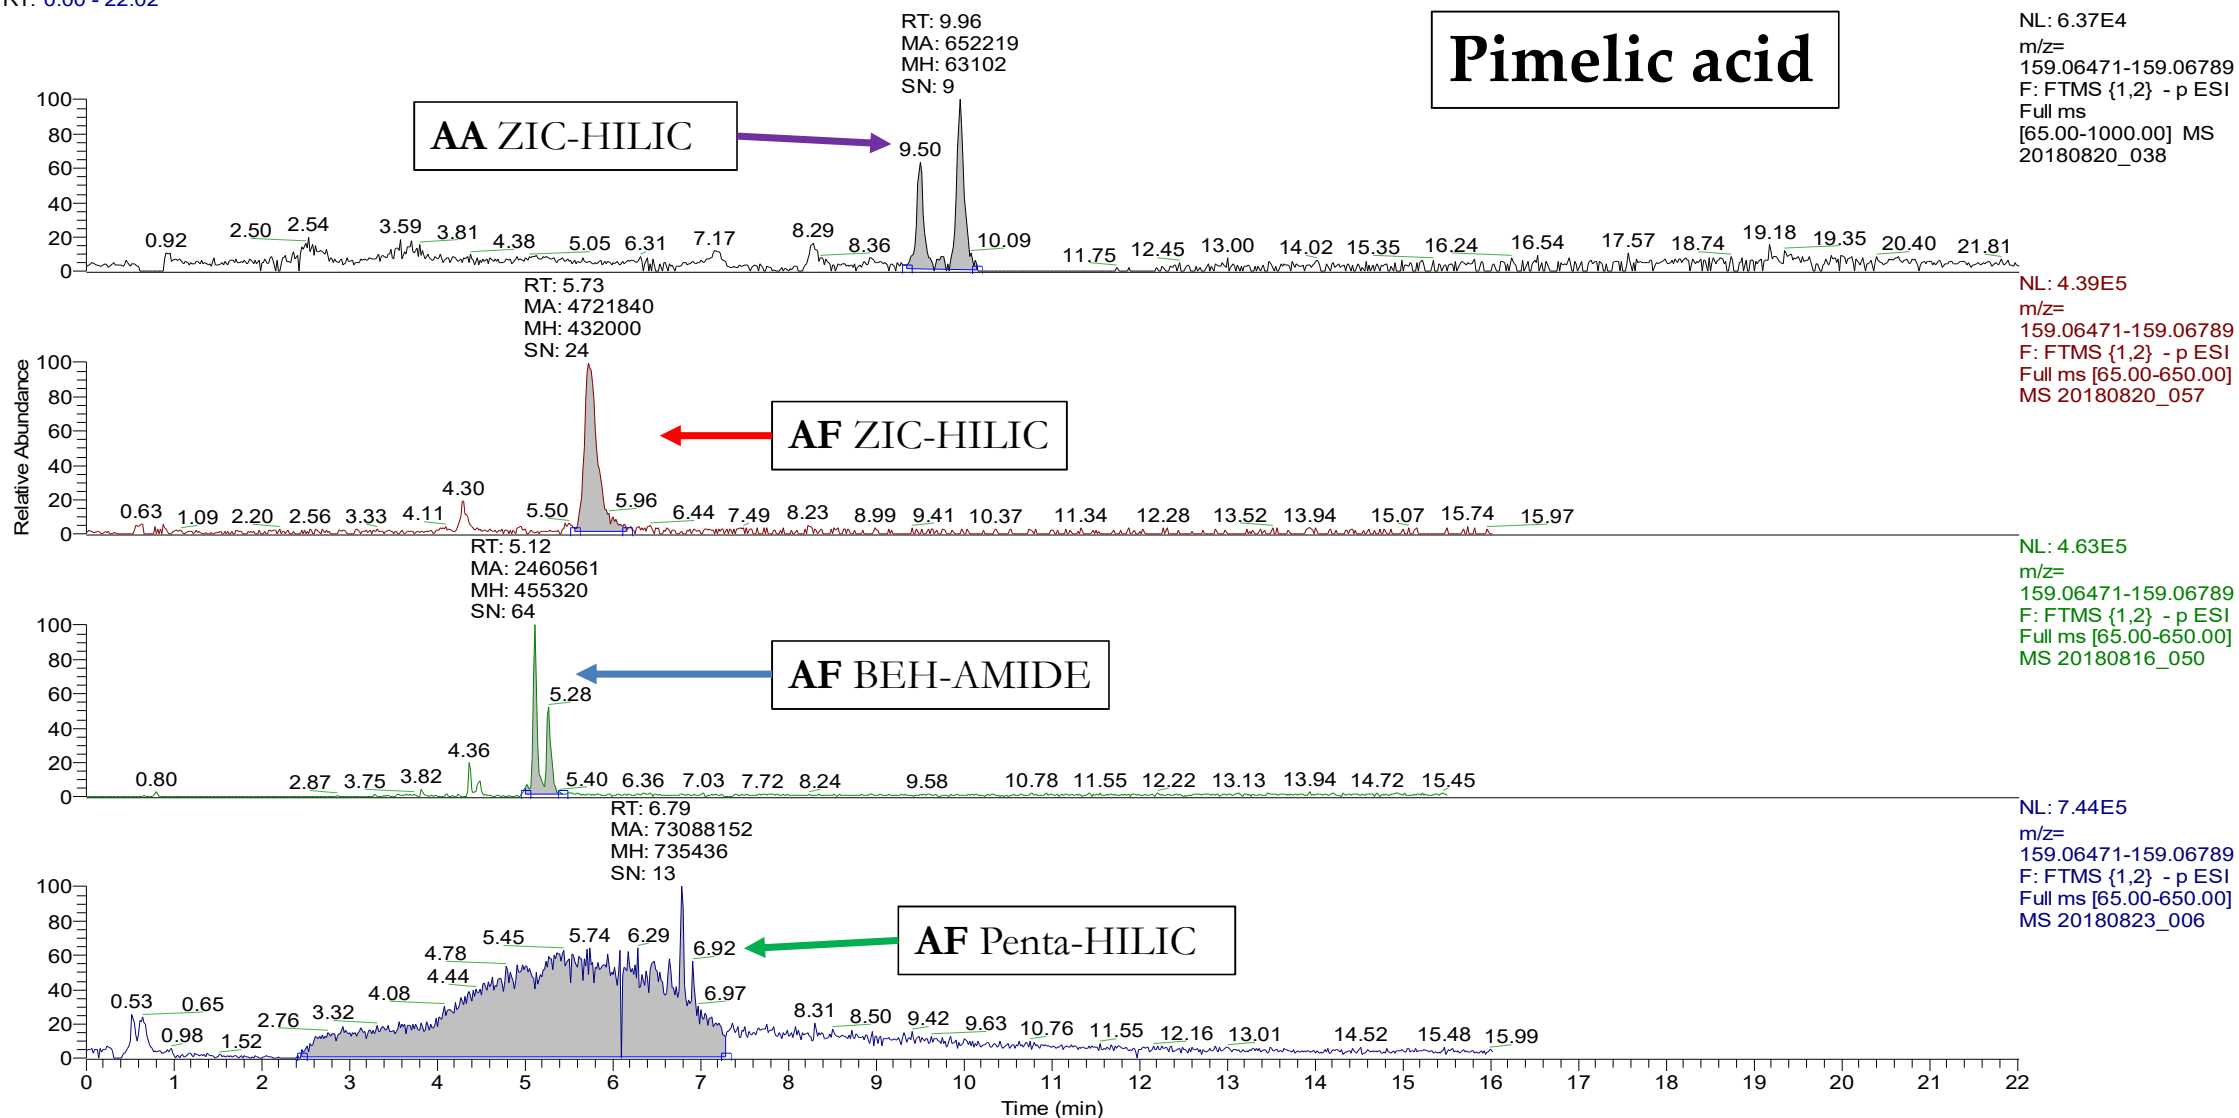

**Figure S2.** A comparison of the peaks of Pimelic acid between the AA method on the Zic-Hilic column and the AF method on the Zic-Hilic, the BEH-Amide and the Penta-Hilic column.

RT: 8.33 - 9.07

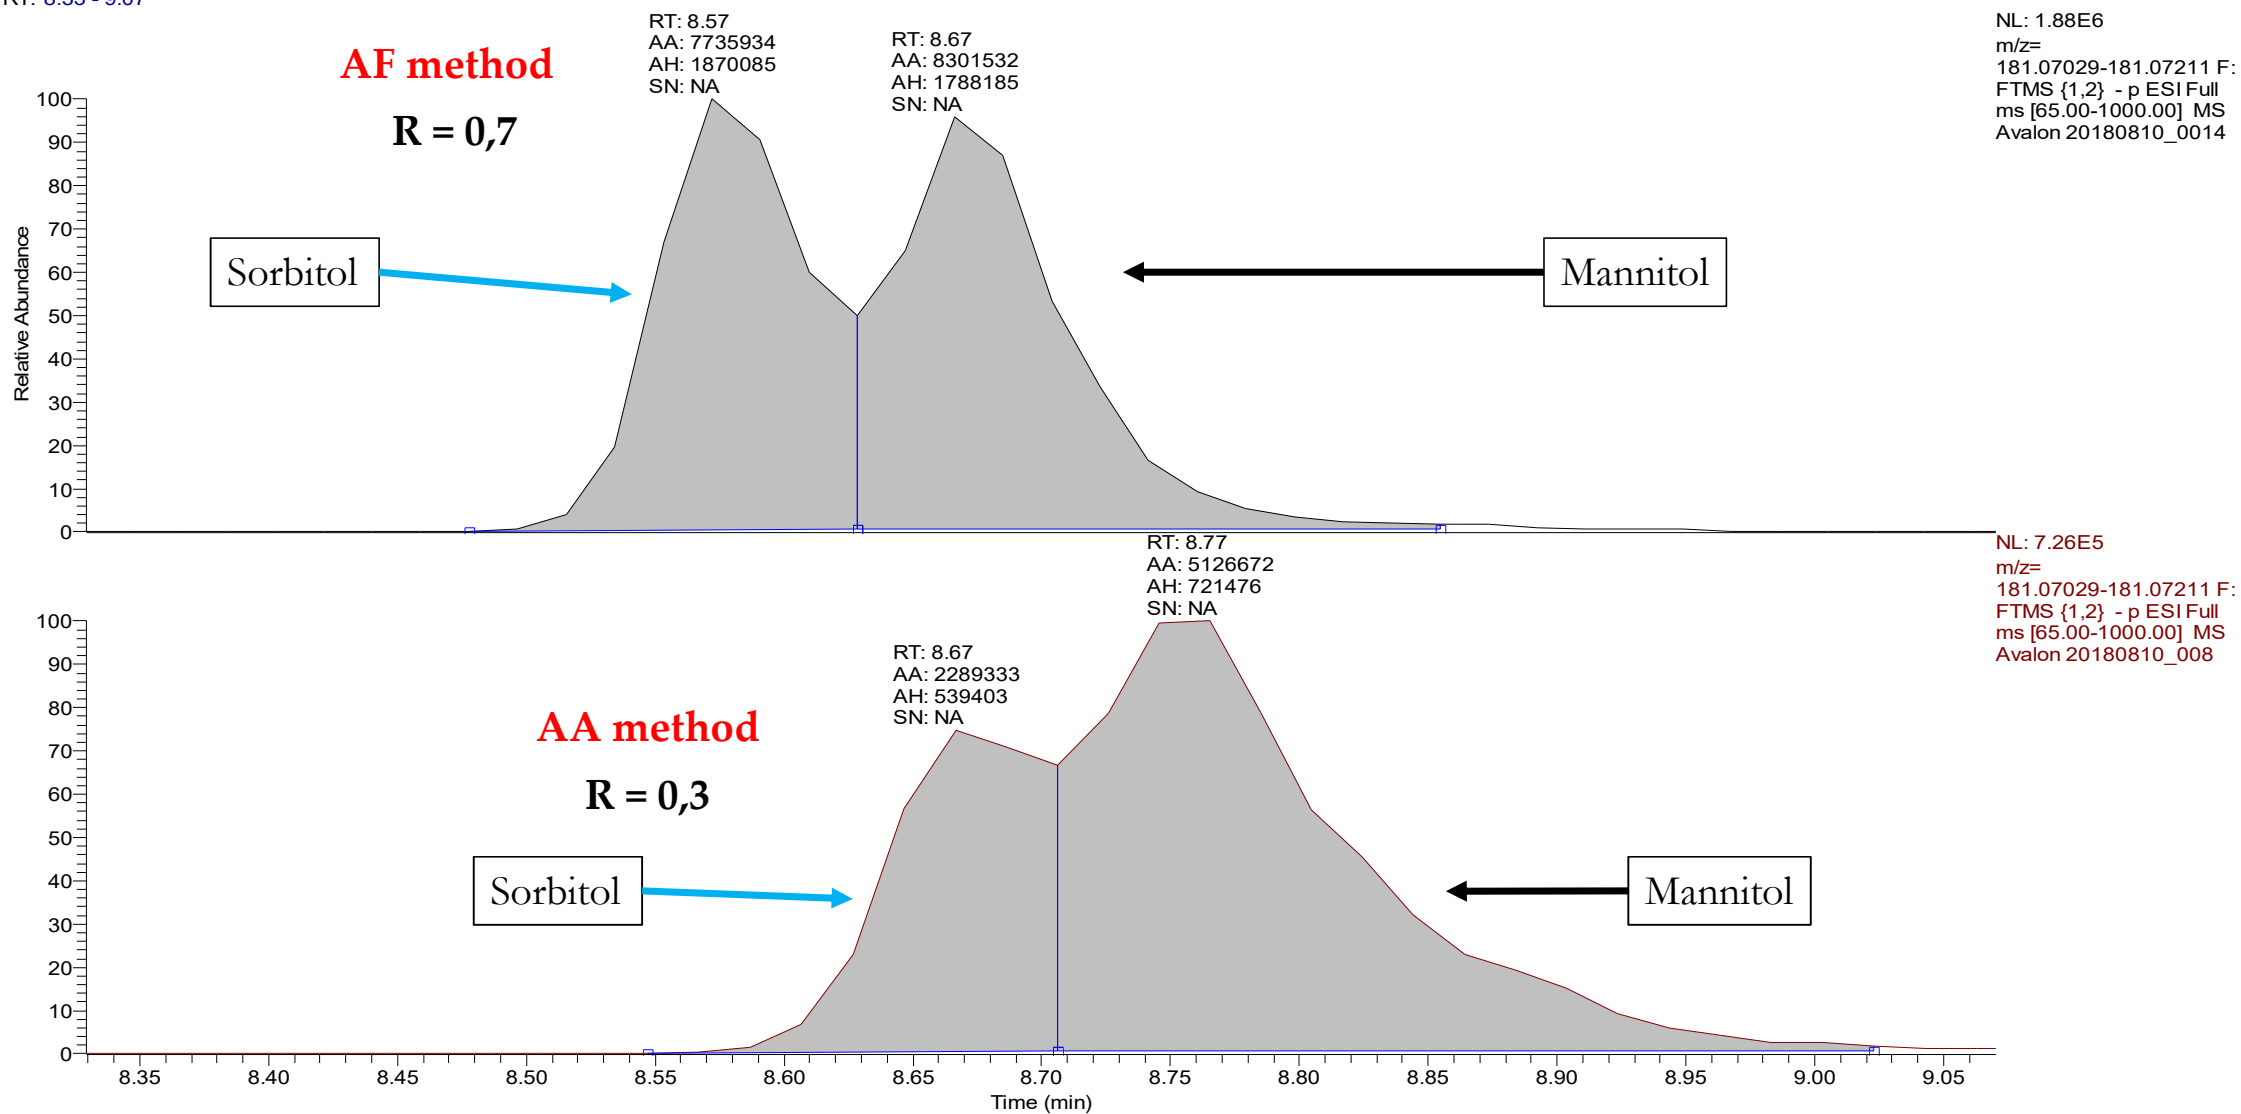

Figure S3. A comparison of the chromatographic resolution of the AA and AF methods for sugars.

RT: 7.25 - 14.63

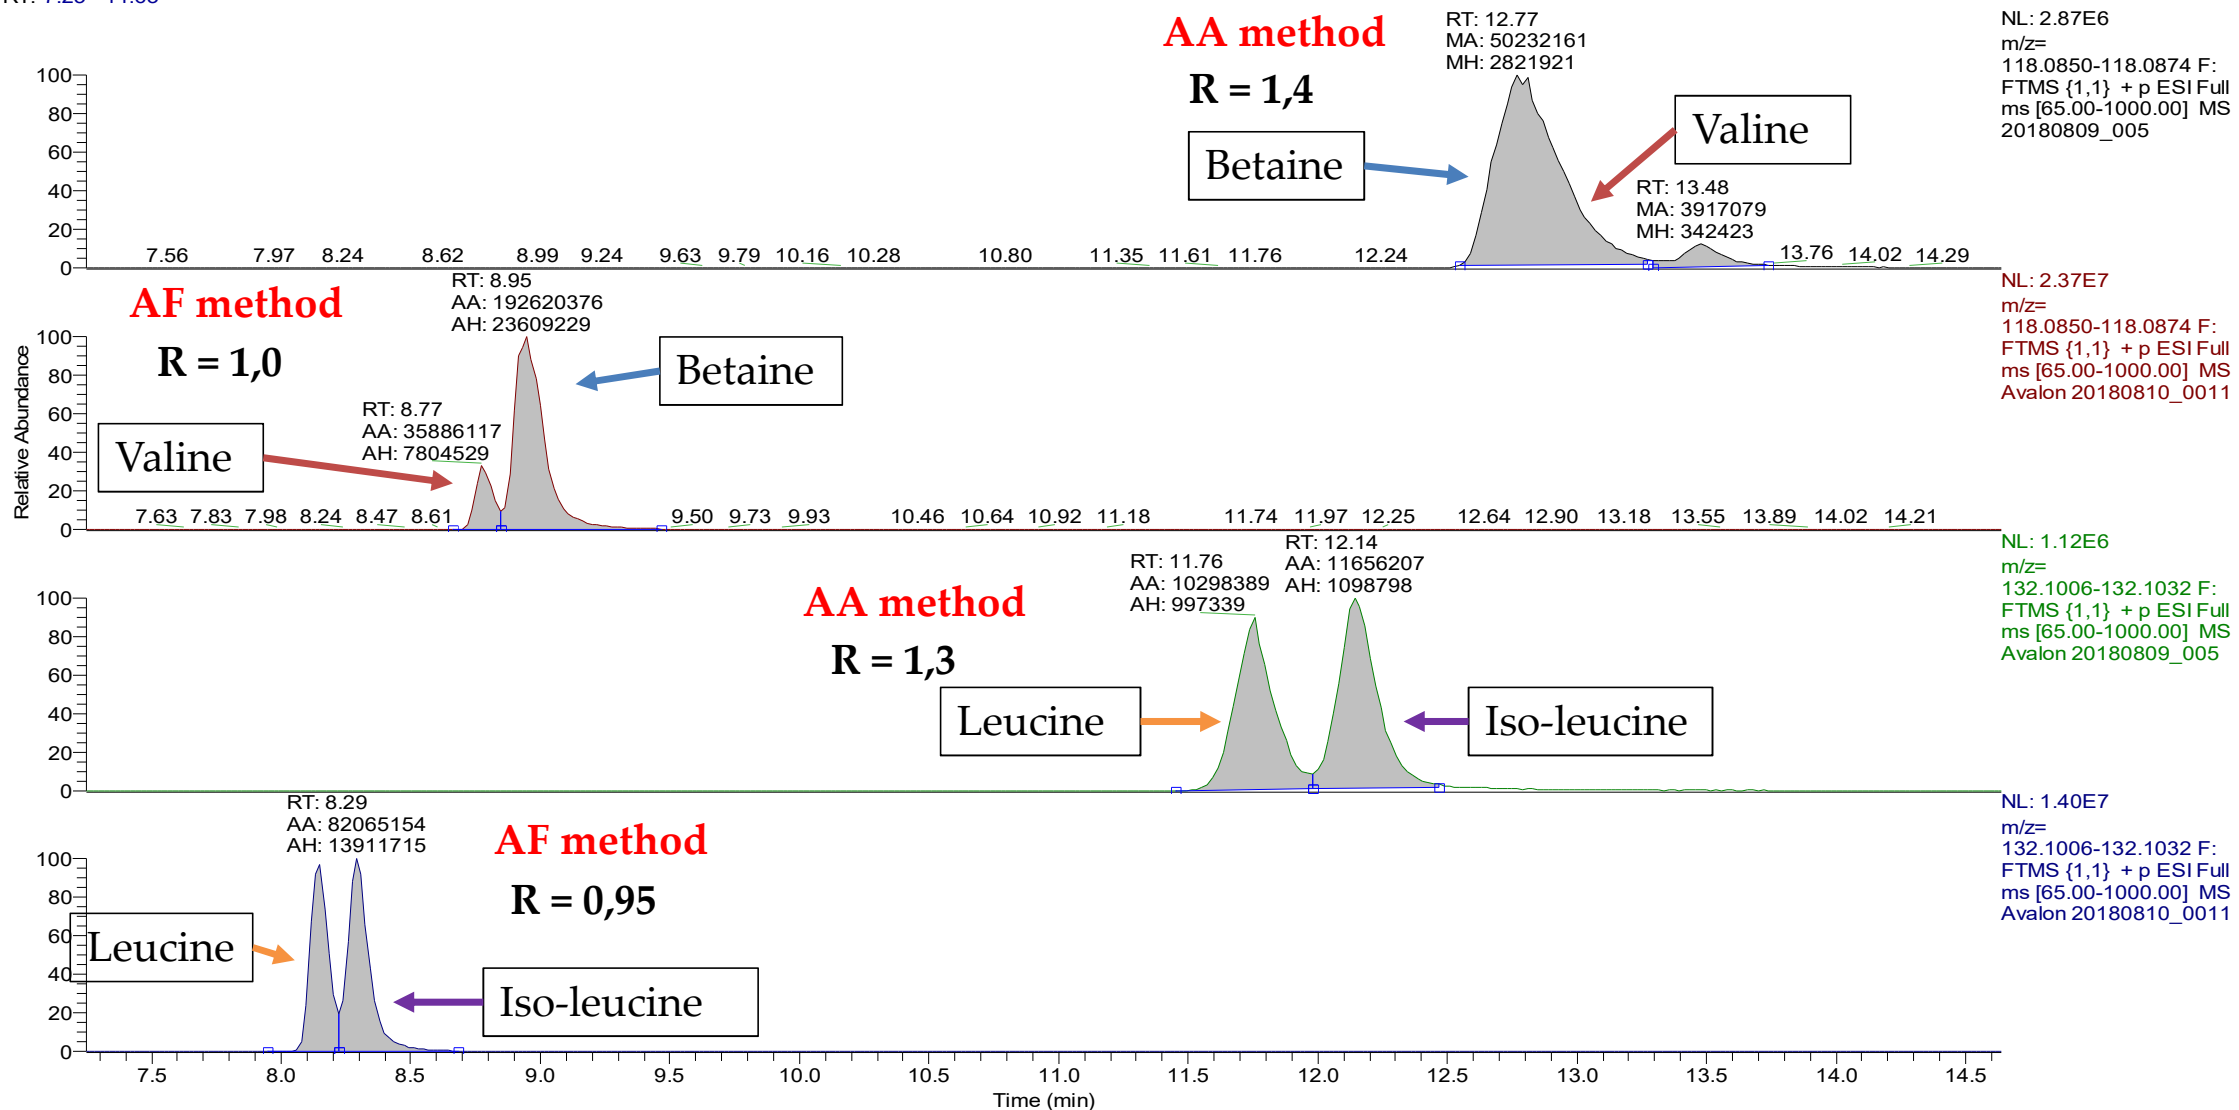

Figure S4. A comparison of the chromatographic resolution of the AA and AF methods for amino-acids.

RT: 0.00 - 15.99

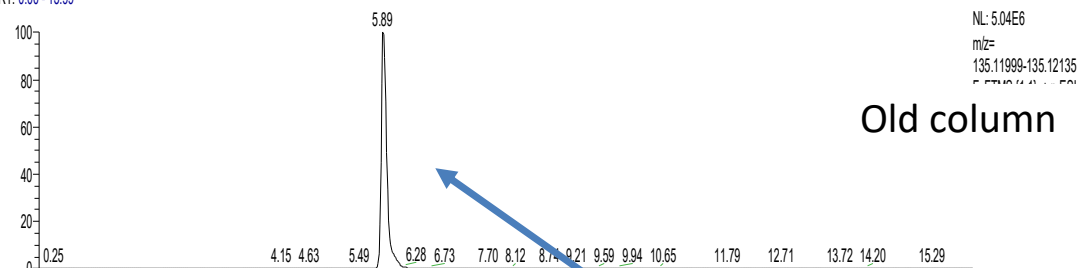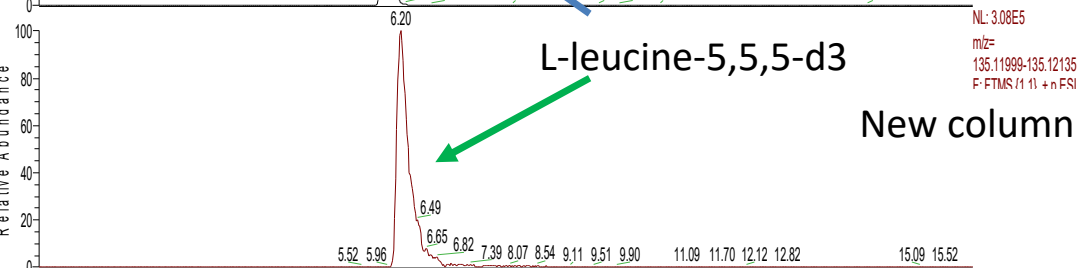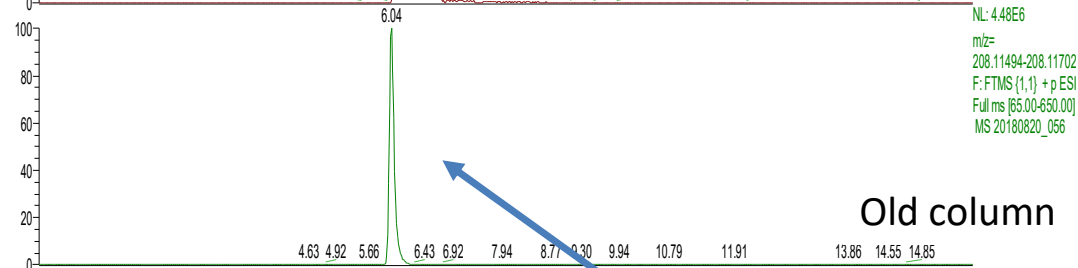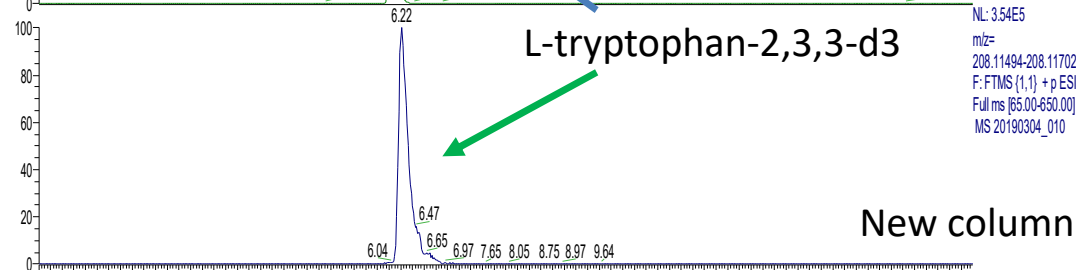

RT: 0.10 - 15.96

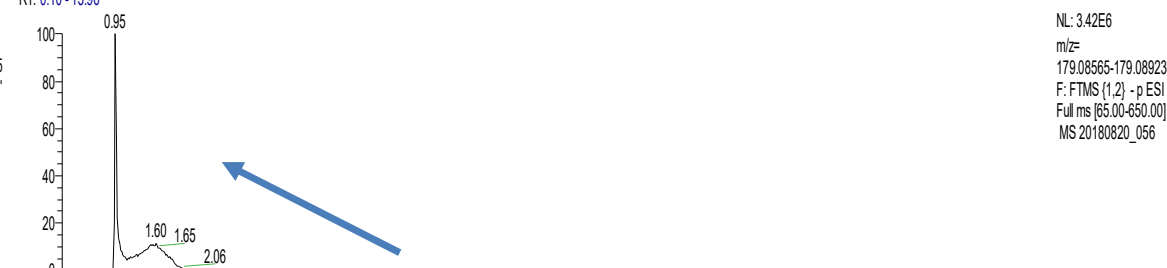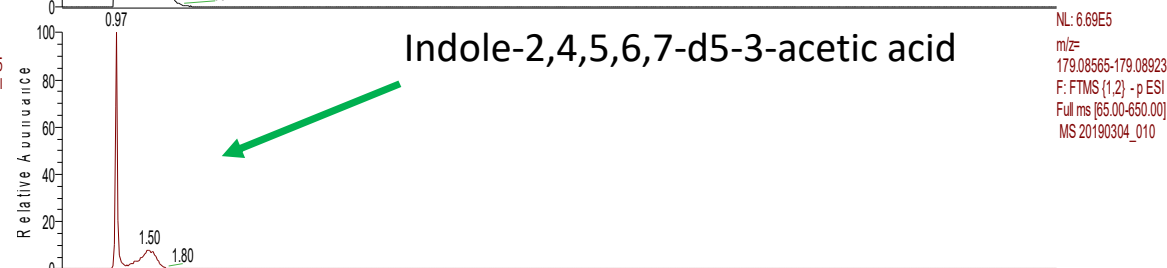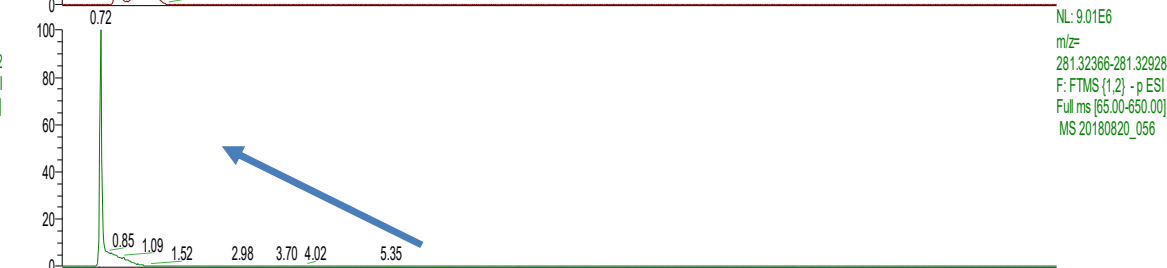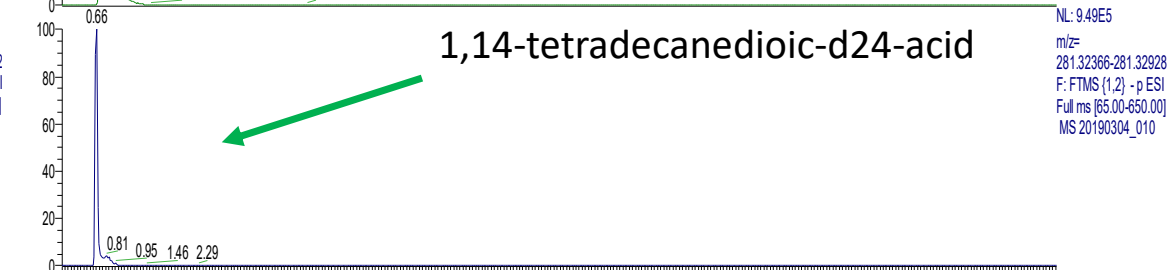

Figure S5. A comparison of the RT shifts between old and new ZIC-Hilic columns both used with the AF method.
